# Supplementary material
Source: PubMed Central journal article supplement (PMC5108686)
Supplement: NIHMS805577-supplement-supplement_1.pdf [file NIHMS805577-supplement-supplement_1.pdf]

# Supplemental Figures

# Supplemental Figure 1

## A. Probabilistic Sensitivity Analysis Summary: Biennial Stool DNA Testing with Diagnostic White Light Colonoscopy Versus No Surveillance (Natural History)

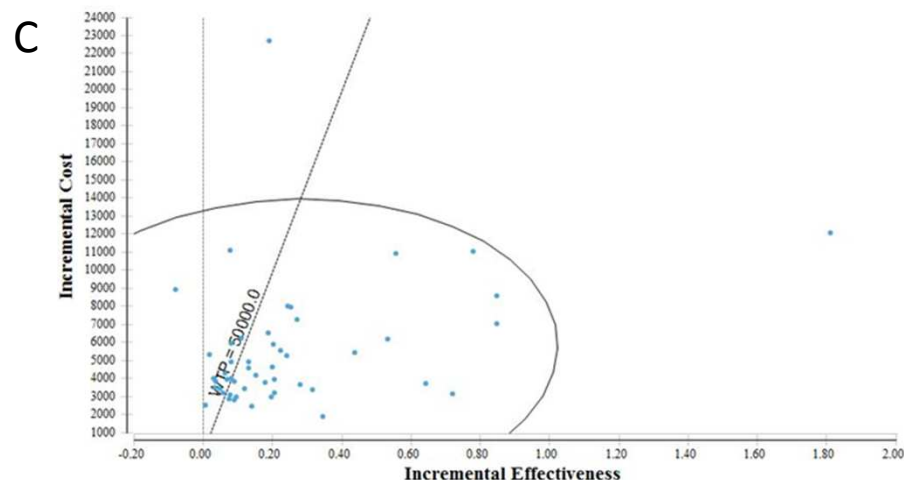

| Component | Quadrant | Overall % (n=100) | Interpretation                                                                                                                                                       |
|-----------|----------|-------------------|----------------------------------------------------------------------------------------------------------------------------------------------------------------------|
| C-1       | Q-IV     | 3%                | Screening strategy is less costly and more effective than no surveillance. <u>Screening strategy recommended</u> because it absolutely dominates no surveillance.    |
| C-2       | Q-I      | 63%               | Screening strategy is more costly and more effective than no surveillance. <u>Screening strategy recommended</u> because its ICER does not exceed WTP.               |
| C-3       | Q-III    | 0%                | Screening strategy is less costly and less effective than no surveillance. <u>Screening strategy recommended</u> because its ICER does not exceed WTP.               |
| C-4       | Q-I      | 28%               | Screening strategy is more costly and more effective than no surveillance. Screening strategy not recommended because its ICER exceeds WTP.                          |
| C-5       | Q-III    | 1%                | Screening strategy is less costly and less effective than no surveillance. Screening strategy not recommended because its ICER exceeds WTP.                          |
| C-6       | Q-II     | 5%                | Screening strategy is more costly and less effective than no surveillance. Screening strategy not recommended because it is absolutely dominated by no surveillance. |

# Supplemental Figure 1

## B. Probabilistic Sensitivity Analysis Summary: Biennial Chromoendoscopy Versus No Surveillance (Natural History)

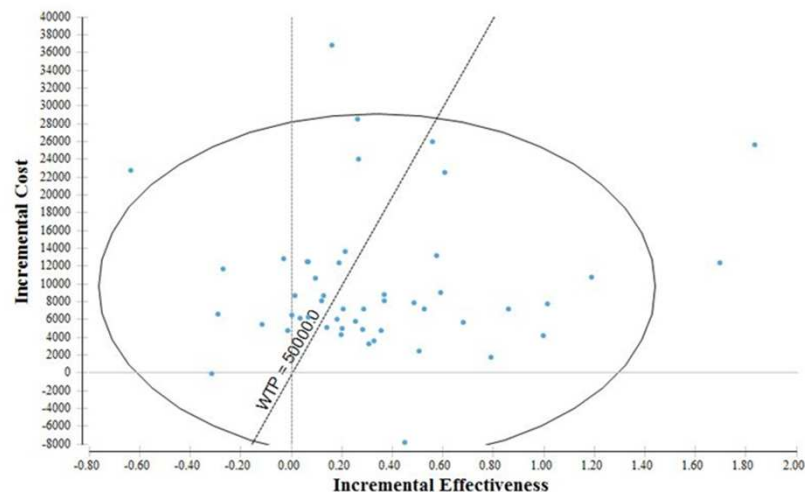

| Component | Quadrant | Overall % (n=100) | Interpretation                                                                                                                                                       |
|-----------|----------|-------------------|----------------------------------------------------------------------------------------------------------------------------------------------------------------------|
| C-1       | Q-IV     | 11%               | Screening strategy is less costly and more effective than no surveillance. <u>Screening strategy recommended</u> because it absolutely dominates no surveillance.    |
| C-2       | Q-I      | 55%               | Screening strategy is more costly and more effective than no surveillance. <u>Screening strategy recommended</u> because its ICER does not exceed WTP.               |
| C-3       | Q-III    | 0%                | Screening strategy is less costly and less effective than no surveillance. <u>Screening strategy recommended</u> because its ICER does not exceed WTP.               |
| C-4       | Q-I      | 20%               | Screening strategy is more costly and more effective than no surveillance. Screening strategy not recommended because its ICER exceeds WTP.                          |
| C-5       | Q-III    | 1%                | Screening strategy is less costly and less effective than no surveillance. Screening strategy not recommended because its ICER exceeds WTP.                          |
| C-6       | Q-II     | 13%               | Screening strategy is more costly and less effective than no surveillance. Screening strategy not recommended because it is absolutely dominated by no surveillance. |

# Supplemental Figure 1

## C. Probabilistic Sensitivity Analysis Summary: Biennial White Light Colonoscopy Versus No Surveillance (Natural History)

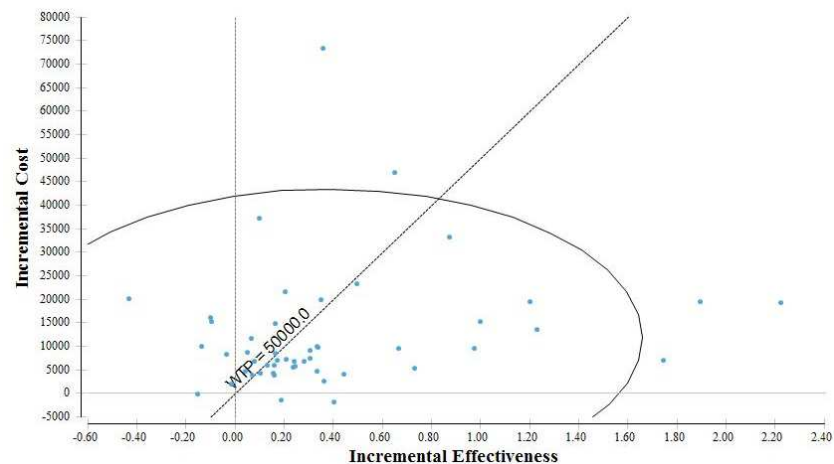

| Component | Quadrant | Overall % (n=100) | Interpretation                                                                                                                                                       |
|-----------|----------|-------------------|----------------------------------------------------------------------------------------------------------------------------------------------------------------------|
| C-1       | Q-IV     | 11%               | Screening strategy is less costly and more effective than no surveillance. <u>Screening strategy recommended</u> because it absolutely dominates no surveillance.    |
| C-2       | Q-I      | 44%               | Screening strategy is more costly and more effective than no surveillance. <u>Screening strategy recommended</u> because its ICER does not exceed WTP.               |
| C-3       | Q-III    | 1%                | Screening strategy is less costly and less effective than no surveillance. <u>Screening strategy recommended</u> because its ICER does not exceed WTP.               |
| C-4       | Q-I      | 32%               | Screening strategy is more costly and more effective than no surveillance. Screening strategy not recommended because its ICER exceeds WTP.                          |
| C-5       | Q-III    | 1%                | Screening strategy is less costly and less effective than no surveillance. Screening strategy not recommended because its ICER exceeds WTP.                          |
| C-6       | Q-II     | 11%               | Screening strategy is more costly and less effective than no surveillance. Screening strategy not recommended because it is absolutely dominated by no surveillance. |

# Supplemental Figure 2

## Sampling of CRC incidence rate with additional clusters of two or four probability-based variables

i. By probabilities of local and regional CRC mortality, and transition probabilities of local CRC to regional and regional to distant CRC.

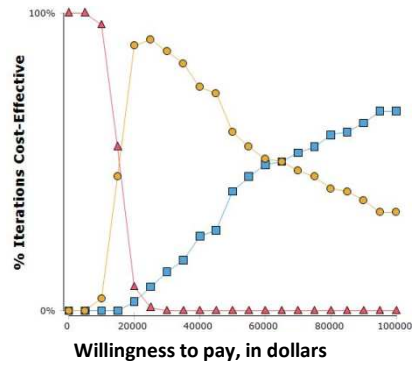

ii. By probability of a given CRC stage in screening-based modalities

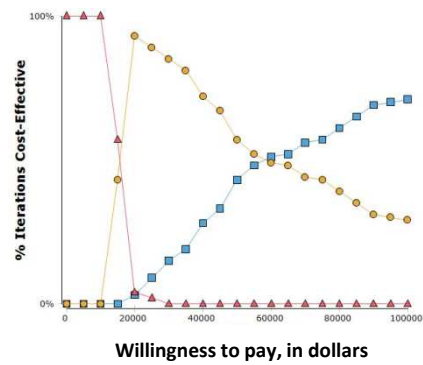

iii. By probabilities of chromoendoscopy accuracy for dysplasia and probability of death due to other causes

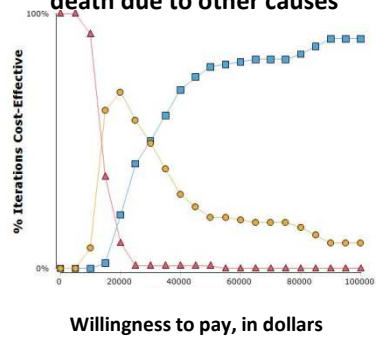

iv. By probabilities of colorectal cancer in patients with high-grade dysplasia and stool DNA accuracy for dysplasia

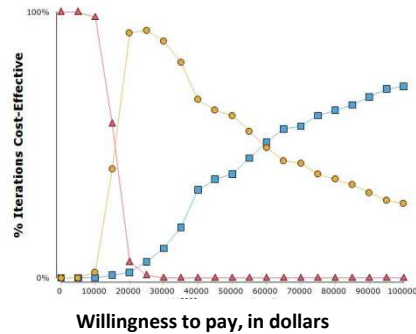

- ▲ No surveillance
- Stool DNA every 2 years, with chromoendoscopy for test + patients
- Chromoendoscopy every 2 years

**Supplemental Table 1: Additional transition probabilities, utilities and model variables**

| Variable                                       | Base case | Range         | Monte Carlo distribution (base case, 95% CI) | References |
|------------------------------------------------|-----------|---------------|----------------------------------------------|------------|
| Ulcerative Colitis                             |           |               |                                              |            |
| Annual rate of UC flare requiring colectomy    | 0.0023    | 0.0016-0.0075 | Beta (0.0023; 0.0015)                        | 1,2        |
| Probability of death due to other causes in UC | 0.0013    | 0.0001-0.003  | Beta (0.0013; SD 0.0007)                     | 3          |
| Colonoscopy test characteristic                |           |               |                                              |            |
| WLE sensitivity for dysplasia                  | 0.695     | 0.00-1.00     | Beta (0.695, SD 0.100)                       | 4-7        |
| WLE specificity for dysplasia                  | 0.9       | 0.00-1.00     | Beta (0.90, SD 0.15)                         | 4, 7, 8    |
| WLE or chromoendoscopy sensitivity for CRC     | 0.9       | 0.80-1.00     | Beta (0.9; SD 0.05)                          | 4, 6, 9    |
| WLE or chromoendoscopy specificity for CRC     | 0.999     | 0.90-1.00     | Beta (0.999; SD 0.025)                       | 1, 4       |
| Chromoendoscopy sensitivity for                | 0.833     | 0.36-1.00     | Beta (0.833, SD 0.159)                       | 7, 10      |

|                                                             |       |             |                                       |        |
|-------------------------------------------------------------|-------|-------------|---------------------------------------|--------|
| dysplasia in UC                                             |       |             |                                       |        |
| Chromoendoscopy specificity for dysplasia in UC             | 0.913 | 0.44-1.00   | Beta (0.913, SD 0.141)                | 8, 10  |
| Dysplasia                                                   |       |             |                                       |        |
| Probability of LGD if dysplasia on surveillance colonoscopy | 0.75  | 0.61-0.80   | Beta (0.75; SD 0.048)                 | 7, 11  |
| Probability of HGD if dysplasia on surveillance colonoscopy | 0.25  | 0.20-0.38   | Beta (0.25; SD 0.045)                 | 7, 11  |
| Proportion proceeding to colectomy if LGD                   | 0.60  | 0-1.00      | Beta (0.60; SD 0.25)                  | 12     |
| Probability of synchronous CRC if LGD                       | 0.19  | 0.04-0.46   | Beta (0.19, SD 0.105)                 | 13, 14 |
| Probability of developing CRC given LGD                     | 0.14  | 0.090-0.314 | 0.090-0.314<br>Beta (0.140; SD 0.056) | 14     |
| Probability of synchronous CRC if HGD                       | 0.53  | 0.42-0.67   | Beta (0.53, 0.06)                     | 13, 15 |

|                                                   |        |               |                          |       |
|---------------------------------------------------|--------|---------------|--------------------------|-------|
| Probability of dysplasia in chronic UC            | 0.0036 | 0.0008-0.015  | Beta (0.0036, SD 0.004)  | 16    |
| Cancer progression (annual transition proportion) |        |               |                          |       |
| From local CRC to regional CRC                    | 0.20   | 0.10-0.30     | Beta (0.20; SD 0.05)     | 17    |
| From regional CRC to distant CRC                  | 0.40   | 0.20-0.60     | Beta (0.40; SD 0.10)     | 17    |
| Cancer mortality                                  |        |               |                          |       |
| Local cancer (Dukes A/B, stage 1-2)               | 0.0211 | 0.0158-0.0263 | Beta (0.0211; SD 0.0026) | 18    |
| Regional cancer (Dukes C, stage 3)                | 0.0699 | 0.0524-0.0874 | Beta (0.0699; SD 0.0088) | 18    |
| Distant cancer (Dukes D, stage 4)                 | 0.3467 | 0.2600-0.4334 | Beta (0.3467; SD 0.0434) | 18    |
| Adverse events                                    |        |               |                          |       |
| Mortality from emergent colectomy                 | 0.024  | 0.018-0.16    | Beta (0.024; SD 0.036)   | 19    |
| Mortality from elective colectomy                 | 0.006  | 0.0035-0.066  | Beta (0.006; SD 0.016)   | 1, 19 |
| Mortality from colectomy for CRC                  | 0.042  | 0.039-0.057   | Beta (0.042; SD 0.005)   | 20    |



|                                                    |         |                |                               |        |
|----------------------------------------------------|---------|----------------|-------------------------------|--------|
| Morbidity from emergent colectomy                  | 0.421   | 0.316-0.526    | Beta (0.421; SD 0.053)        | 19     |
| Morbidity from elective colectomy                  | 0.346   | 0.260-0.433    | Beta (0.346; SD 0.043)        | 19     |
| Morbidity from colectomy for CRC                   | 0.384   | 0.278-0.405    | Beta (0.384; SD 0.032)        | 21     |
| Mortality from surveillance colonoscopy            | 0.00007 | 0.00006-0.0003 | Beta (0.00007; SD 0.00006)    | 21     |
| Morbid adverse event from surveillance colonoscopy | 0.005   | 0.001-0.009    | Beta (0.005; SD 0.002)        | 21     |
| Perforation from surveillance colonoscopy          | 0.0001  | 0.00003-0.003  | Beta (0.0001; SD 0.0007)      | 21     |
| Utilities                                          |         |                |                               |        |
| Chronic UC, with or without dysplasia              | 0.94    | 0.85-1.0       | Triangular (0.94, 0.85, 1.0)  | 22, 23 |
| Post-IPAA                                          | 0.9     | 0.84-0.94      | Triangular (0.90, 0.84, 0.94) | 21     |
| Local cancer                                       | 0.74    | 0.69-0.78      | Triangular                    | 24     |

|                                           |               |             |                                  |        |
|-------------------------------------------|---------------|-------------|----------------------------------|--------|
| (Dukes A/B, stage 1-2)                    |               |             | (0.74, 0.69, 0.78)               |        |
| Regional cancer (Dukes C, stage 3)        | 0.59          | 0.54-0.69   | Triangular (0.59, 0.54, 0.69)    | 24     |
| Distant cancer (Dukes D, stage 4)         | 0.25          | 0.20-0.31   | Triangular (0.25, 0.20, 0.31)    | 24     |
| Severe UC flare resulting in colectomy    | 0.42 (1 mo)   | 0.10-0.70   | Triangular (0.42, 0.10, 0.70)    | 21, 23 |
| Surgery (IPAA or other type of colectomy) | 0.61 (1 mo)   | 0.32-0.84   | Triangular (0.61, 0.32, 0.84)    | 23     |
| Colonoscopy adverse events                | 0.031 (1 mo)  | 0.001-0.125 | Triangular (0.031, 0.001, 0.125) | 1      |
| Postoperative adverse events              | 0.55 (1 mo)   | 0.30-0.70   | Triangular (0.55, 0.30, 0.70)    | 23     |
| Other variables                           |               |             |                                  |        |
| Discount rate                             | 3%            |             |                                  | 25, 26 |
| Cycle length                              | 1 y           | 0-10 y      |                                  |        |
| Willingness to pay threshold              | \$50,000/QALY |             |                                  | 27     |

CI, Confidence interval; UC, ulcerative colitis; SD, standard deviation; WLE, white-light endoscopy; CRC, colorectal cancer; LGD, low-grade dysplasia; HGD, high-grade dysplasia; IPAA, ileal pouch anal anastomosis; QALY, quality-adjusted life year

Adapted from Konijeti GG, Shrimel MG, Ananthakrishnan AN, Chan AT. Cost-effectiveness analysis of chromoendoscopy for colorectal cancer surveillance in patients with ulcerative colitis. *Gastrointest Endosc.* 2014 Mar;79(3):455-65 and used with permission.

1. Rubenstein JH, Waljee AK, Jeter JM, Velayos FS, Ladabaum U, Higgins PD. Cost effectiveness of ulcerative colitis surveillance in the setting of 5-aminosalicylates. *The American journal of gastroenterology* 2009;104:2222-32.
2. Kohn A, Fano V, Monterubbiansi R, Davoli M, Marrollo M, Stasi E, Perucci C, Prantera C. Surgical and nonsurgical hospitalization rates and charges for patients with ulcerative colitis in Italy: a 10-year cohort study. *Digestive and liver disease : official journal of the Italian Society of Gastroenterology and the Italian Association for the Study of the Liver* 2012;44:369-74.
3. Herrinton LJ, Liu L, Levin TR, Allison JE, Lewis JD, Velayos F. Incidence and mortality of colorectal adenocarcinoma in persons with inflammatory bowel disease from 1998 to 2010. *Gastroenterology* 2012;143:382-9.
4. Gorfine SR, Bauer JJ, Harris MT, Kreel I. Dysplasia complicating chronic ulcerative colitis: is immediate colectomy warranted? *Dis Colon Rectum* 2000;43:1575-81.
5. Rubin CE, Haggitt RC, Burmer GC, Brentnall TA, Stevens AC, Levine DS, Dean PJ, Kimmey M, Perera DR, Rabinovitch PS. DNA aneuploidy in colonic biopsies predicts future development of dysplasia in ulcerative colitis. *Gastroenterology* 1992;103:1611-20.
6. Rubin DT, Rothe JA, Hetzel JT, Cohen RD, Hanauer SB. Are dysplasia and colorectal cancer endoscopically visible in patients with ulcerative colitis? *Gastrointest Endosc* 2007;65:998-1004.
7. Matsumoto T, Iwao Y, Igarashi M, Watanabe K, Otsuka K, Watanabe T, Iizuka B, Hida N, Sada M, Chiba T, Kudo SE, Oshitani N, Nagawa H, Ajioka Y, Hibi T. Endoscopic and chromoendoscopic atlas featuring dysplastic lesions in surveillance colonoscopy for patients with long-standing ulcerative colitis. *Inflammatory Bowel Diseases* 2008;14:259-64.
8. Subramanian V, Mannath J, Ragnath K, Hawkey CJ. Meta-analysis: the diagnostic yield of chromoendoscopy for detecting dysplasia in patients with colonic inflammatory bowel disease. *Alimentary Pharmacology & Therapeutics* 2011;33:304-12.
9. Pickhardt PJ, Choi JR, Hwang I, Butler JA, Puckett ML, Hildebrandt HA, Wong RK, Nugent PA, Mysliwiec PA, Schindler WR. Computed tomographic virtual colonoscopy to screen for colorectal neoplasia in asymptomatic adults. *N Engl J Med* 2003;349:2191-200.
10. Wu L, Li P, Wu J, Cao Y, Gao F. The diagnostic accuracy of chromoendoscopy for dysplasia in ulcerative colitis: meta-analysis of six randomized controlled trials. *Colorectal disease : the official journal of the Association of Coloproctology of Great Britain and Ireland* 2012;14:416-20.

11. Rutter MD, Saunders BP, Wilkinson KH, Rumbles S, Schofield G, Kamm MA, Williams CB, Price AB, Talbot IC, Forbes A. Thirty-year analysis of a colonoscopic surveillance program for neoplasia in ulcerative colitis. *Gastroenterology* 2006;130:1030-8.
12. Siegel CA, Schwartz LM, Woloshin S, Cole EB, Rubin DT, Vay T, Baars J, Sands BE. When should ulcerative colitis patients undergo colectomy for dysplasia? Mismatch between patient preferences and physician recommendations. *Inflammatory Bowel Diseases* 2010;16:1658-62.
13. Hassan C, Pickhardt PJ, Zullo A, Di Giulio E, Laghi A, Kim DH, Iafrate F. Cost-effectiveness of early colonoscopy surveillance after cancer resection. *Digestive and liver disease : official journal of the Italian Society of Gastroenterology and the Italian Association for the Study of the Liver* 2009;41:881-5.
14. Ullman T, Croog V, Harpaz N, Sachar D, Itzkowitz S. Progression of flat low-grade dysplasia to advanced neoplasia in patients with ulcerative colitis. *Gastroenterology* 2003;125:1311-9.
15. Hata K, Watanabe T, Kazama S, Suzuki K, Shinozaki M, Yokoyama T, Matsuda K, Muto T, Nagawa H. Earlier surveillance colonoscopy programme improves survival in patients with ulcerative colitis associated colorectal cancer: results of a 23-year surveillance programme in the Japanese population. *Br J Cancer* 2003;89:1232-6.
16. Jess T, Loftus EV, Jr., Velayos FS, Harmsen WS, Zinsmeister AR, Smyrk TC, Tremaine WJ, Melton LJ, 3rd, Munkholm P, Sandborn WJ. Incidence and prognosis of colorectal dysplasia in inflammatory bowel disease: a population-based study from Olmsted County, Minnesota. *Inflamm Bowel Dis* 2006;12:669-76.
17. Bernstein CN, Shanahan F, Weinstein WM. Are we telling patients the truth about surveillance colonoscopy in ulcerative colitis? *Lancet* 1994;343:71-4.
18. Howlader N, Noone AM, Krapcho M, Neyman N, Aminou R, Waldron W, Altekruse SF, Kosary CL, Ruhl J, Tatalovich Z, Cho H, Mariotto A, Eisner MP, Lewis DR, Chen HS, Feuer EJ, Cronin KA. SEER Cancer Statistics Review, 1975-2009 (Vintage 2009 Populations), National Cancer Institute. Bethesda, MD, [http://seer.cancer.gov/csr/1975\\_2009\\_pops09/](http://seer.cancer.gov/csr/1975_2009_pops09/), based on November 2011 SEER data submission, posted to the SEER web site, April 2012, 2012.
19. de Silva S, Ma C, Proulx MC, Crespín M, Kaplan BS, Hubbard J, Prusinkiewicz M, Fong A, Panaccione R, Ghosh S, Beck PL, Maclean A, Buie D, Kaplan GG. Postoperative complications and mortality following colectomy for ulcerative colitis. *Clinical gastroenterology and hepatology : the official clinical practice journal of the American Gastroenterological Association* 2011;9:972-80.
20. Schneider EB, Hyder O, Brooke BS, Efron J, Cameron JL, Edil BH, Schulick RD, Choti MA, Wolfgang CL, Pawlik TM. Patient readmission and mortality after colorectal surgery for colon cancer: impact of length of stay relative to other clinical factors. *J Am Coll Surg* 2012;214:390-8; discussion 398-9.
21. Fisher DA, Maple JT, Ben-Menachem T, Cash BD, Decker GA, Early DS, Evans JA, Fanelli RD, Fukami N, Hwang JH, Jain R, Jue TL, Khan KM, Malpas PM, Sharaf RN, Shergill AK, Dominitz JA. Complications of colonoscopy. *Gastrointest Endosc* 2011;74:745-52.
22. Nguyen GC, Frick KD, Dassopoulos T. Medical decision analysis for the management of unifocal, flat, low-grade dysplasia in ulcerative colitis. *Gastrointest Endosc* 2009;69:1299-310.
23. Tsai HH, Punekar YS, Morris J, Fortun P. A model of the long-term cost effectiveness of scheduled maintenance treatment with infliximab for moderate-to-severe ulcerative colitis. *Alimentary Pharmacology & Therapeutics* 2008;28:1230-9.
24. Ness RM, Holmes AM, Klein R, Dittus R. Utility valuations for outcome states of colorectal cancer. *The American journal of gastroenterology* 1999;94:1650-7.
25. Siegel JE, Weinstein MC, Russell LB, Gold MR. Recommendations for reporting cost-effectiveness analyses. Panel on Cost-Effectiveness in Health and Medicine. *Jama* 1996;276:1339-41.

26. Weinstein MC, Siegel JE, Gold MR, Kamlet MS, Russell LB. Recommendations of the Panel on Cost-effectiveness in Health and Medicine. *Jama* 1996;276:1253-8.
27. Grosse SD. Assessing cost-effectiveness in healthcare: history of the \$50,000 per QALY threshold. *Expert review of pharmacoeconomics & outcomes research* 2008;8:165-78.

"Relative to Baseline" Analysis

| STRATEGYNAME                               | COST      | EFF   | INCR COST vs Baseline | INCREFF vs Baseline | ICER vs Baseline |
|--------------------------------------------|-----------|-------|-----------------------|---------------------|------------------|
| No Surveillance (Natural History)          | 189960.26 | 19.65 | 0                     | 0                   | 0                |
| sDNA testing with WLE Confirmatory q2 year | 194913.88 | 19.92 | 4953.626              | 0.266               | 18643            |
| White light endoscopy q2 year              | 201112.19 | 20.05 | 11151.933             | 0.400               | 27907            |

"Incremental" Analysis

| STRATEGYNAME                               | COST        | EFF         | INCR COST   | INCREFF  | ICER  |
|--------------------------------------------|-------------|-------------|-------------|----------|-------|
| No Surveillance (Natural History)          | 189960.2578 | 19.65055763 | 0           | 0        | 0     |
| sDNA testing with WLE Confirmatory q2 year | 194913.8841 | 19.91627132 | 4953.626267 | 0.265714 | 18643 |
| White light endoscopy q2 year              | 201112.1913 | 20.05016251 | 6198.30722  | 0.133891 | 46294 |

| NMB at WTP 0 | NMB at WTP 5000 | NMB at WTP 10000 | NMB at WTP 15000 | NMB at 18642.73 | NMB at 25000 | NMB at 30000 | NMB at 35000 | NMB at 40000 | NMB at 45000 | NMB at 46294 | NMB at 50000 | NMB at 100000 |
|--------------|-----------------|------------------|------------------|-----------------|--------------|--------------|--------------|--------------|--------------|--------------|--------------|---------------|
| -189960.26   | -91707.5        | 6545.319         | 104798.1         | 176379.8        | 301303.7     | 399556.5     | 497809.3     | 596062       | 694314.8     | 719742.7     | 792567.6     | 1775096       |
| -194913.88   | -95332.5        | 4248.829         | 103830.2         | 176379.8        | 302992.9     | 402574.3     | 502155.6     | 601737       | 701318.3     | 727090       | 800899.7     | 1796713       |
| -201112.19   | -100861         | -610.566         | 99640.25         | 172677.6        | 300141.9     | 400392.7     | 500643.5     | 600894.3     | 701145.1     | 727090       | 801395.9     | 1803904       |

highest NMB = optimal strategy at WTP (not)

Net monetary benefit (NMB) analysis (and acceptability curve) directly relates to ICER (G8 through G10)  
 Acceptability curves provide the additional information of quantifying how \*often\* a strategy has a higher NMB at a given WTP

ICERs \*imply\* optimal WTP thresholds  
 No Surv: Optimal at WTP \$0 - <\$18,643  
 sDNA: Optimal at WTP > \$18,643 - < \$46,294  
 WLE: Optimal at WTP >\$46,294

te the concordance with ICER thresholds)

"Relative to Baseline" Analysis

| STRATEGYNAME                                  | COST      | EFF   | INCR COST vs Baseline | INCREFF vs Baseline | ICER_vs_Baseline |
|-----------------------------------------------|-----------|-------|-----------------------|---------------------|------------------|
| No Surveillance (Natural History)             | 189960.26 | 19.65 | 0                     | 0                   | 0                |
| sDNA testing with Chromo Confirmatory q2 year | 194812.43 | 19.95 | 4852.173              | 0.297               | 16362            |
| Chromoendoscopy q2 year                       | 200260.79 | 20.08 | 10300.532             | 0.432               | 23830            |

"Incremental" Analysis

| STRATEGYNAME                                  | COST      | EFF   | INCR COST vs Baseline | INCREFF vs Baseline | ICER_vs_Baseline |
|-----------------------------------------------|-----------|-------|-----------------------|---------------------|------------------|
| No Surveillance (Natural History)             | 189960.26 | 19.65 | 0                     | 0                   | 0                |
| sDNA testing with Chromo Confirmatory q2 year | 194812.43 | 19.95 | 4852.1727             | 0.2965              | 16362            |
| Chromoendoscopy q2 year                       | 200260.79 | 20.08 | 5448.3589             | 0.1357              | 40151            |

| NMB at WTP 0 | NMB at WTP 5000 | NMB at WTP 10000 | NMB at WTP 15000 | NMB at 16362 | NMB at 25000 | NMB at 30000 | NMB at 35000 | NMB at 40000 | NMB at 40151 | NMB at 45000 | NMB at 50000 | NMB at 100000 |
|--------------|-----------------|------------------|------------------|--------------|--------------|--------------|--------------|--------------|--------------|--------------|--------------|---------------|
| -189960      | -91707          | 6545             | 104798           | 131562       | 301304       | 399556       | 497809       | 596062       | 599029       | 694315       | 792568       | 1775096       |
| -194812      | -95077          | 4659             | 104394           | 131562       | 303865       | 403601       | 503336       | 603072       | 606084       | 702807       | 802543       | 1799898       |
| -200261      | -99847          | 567              | 100981           | 128334       | 301809       | 402223       | 502637       | 603051       | 606084       | 703465       | 803879       | 1808020       |

highest NMB = optimal strategy :



at WTP
